# Supplementary material for: Safety, Tolerability and Efficacy of Eslicarbazepine Acetate as Adjunctive Therapy in Patients Aged ≥ 65 Years with Focal Seizures
Source: Springer Nature journal article supplement (doi:10.1007/s40266-018-0602-y), 2018-11-01
Supplement: MOESM1 [file 16244272]

**Safety, Tolerability and Efficacy of Eslicarbazepine Acetate as Adjunctive Therapy in Patients Aged ≥65 Years with Focal Seizures**

Raquel Costa<sup>1</sup>, Bernhard Steinhoff<sup>2</sup>, Helena Gama<sup>1</sup>, Fábio Ikedo<sup>1</sup>, José-Francisco Rocha<sup>1</sup>,  
Patrício Soares-da-Silva<sup>1,3,4</sup>

**Affiliations**

<sup>1</sup> Department of Research and Development, BIAL – Portela & C<sup>a</sup>, S.A., S. Mamede do Coronado, Portugal

<sup>2</sup> Epilepsy Center Kork, Landstrasse 1, 77694 Kehl, Germany

<sup>3</sup> Department of Biomedicine, Unit of Pharmacology and Therapeutics, Faculty of Medicine, University of Porto, Porto, Portugal

<sup>4</sup> MedInUP - Center for Drug Discovery and Innovative Medicines, University of Porto, Porto, Portugal

**Table 1.** Summary of TEAEs by Gender ( $\geq 5\%$  in any gender group, safety population N=72)

|                                        | <b>Female<br/>(N = 34)<br/>n (%) ne</b> | <b>Male<br/>(N = 38)<br/>n (%) ne</b> |
|----------------------------------------|-----------------------------------------|---------------------------------------|
| <b>Patients with at least one TEAE</b> | <b>21 (61.8%) 77</b>                    | <b>26 (68.4%) 75</b>                  |
| Dizziness                              | 5 (14.7%) 7                             | 4 (10.5%) 4                           |
| Somnolence                             | 4 (11.8%) 4                             | 3 (7.9%) 3                            |
| Convulsion                             | 5 (14.7%) 5                             | 1 (2.6%) 1                            |
| Fatigue                                | 2 (5.9%) 2                              | 4 (10.5%) 5                           |
| Hyponatraemia                          | 3 (8.8%) 3                              | 3 (7.9%) 3                            |
| Nasopharyngitis                        | 3 (8.8%) 3                              | 2 (5.3%) 2                            |
| Upper respiratory tract infection      | 4 (11.8%) 5                             | —                                     |
| Bronchitis                             | 1 (2.9%) 1                              | 2 (5.3%) 2                            |
| Blood creatine phosphokinase increased | 2 (5.9%) 2                              | 1 (2.6%) 1                            |
| Gamma-glutamyltransferase increased    | 2 (5.9%) 2                              | 1 (2.6%) 1                            |
| Back pain                              | 2 (5.9%) 2                              | —                                     |
| Headache                               | —                                       | 2 (5.3%) 5                            |
| Hypertension                           | 2 (5.9%) 2                              | —                                     |
| Constipation                           | —                                       | 2 (5.3%) 2                            |

N = Number of patients in Safety Set; n = Number of patients having the event; %, proportion of patients having the event; ne = Number of TEAEs.

**Table 2.** Summary of TEAEs by Age Group (> 1 subject in any age group, safety population N=72)

|                                        | <b>65-69 years<br/>(N = 30)<br/>n (%) ne</b> | <b>70-74 years<br/>(N = 19)<br/>n (%) ne</b> | <b>75-79 years<br/>(N = 19)<br/>n (%) ne</b> | <b>80-84 years<br/>(N = 4)<br/>n (%) ne</b> |
|----------------------------------------|----------------------------------------------|----------------------------------------------|----------------------------------------------|---------------------------------------------|
| <b>Patients with at least one TEAE</b> | <b>20 (66.7%) 48</b>                         | <b>12 (63.2%) 59</b>                         | <b>13 (68.4%) 41</b>                         | <b>2 (50.0%) 4</b>                          |
| Dizziness                              | 4 (13.3%) 4                                  | 3 (15.8%) 4                                  | 2 (10.5%) 3                                  | —                                           |
| Somnolence                             | 4 (13.3%) 4                                  | 1 (5.3%) 1                                   | 2 (10.5%) 2                                  | —                                           |
| Fatigue                                | 1 (3.3%) 1                                   | 4 (21.1%) 5                                  | 1 (5.3%) 1                                   | —                                           |
| Hyponatraemia                          | 3 (10.0%) 3                                  | 3 (15.8%) 3                                  | —                                            | —                                           |
| Convulsion                             | —                                            | 4 (21.1%) 4                                  | 1 (5.3%) 1                                   | 1 (25.0%) 1                                 |
| Nasopharyngitis                        | 3 (10.0%) 3                                  | 2 (10.5%) 2                                  | —                                            | —                                           |
| Upper respiratory tract infection      | 3 (10.0%) 3                                  | 1 (5.3%) 2                                   | —                                            | —                                           |
| Blood creatine phosphokinase increased | 2 (6.7%) 2                                   | 1 (5.3%) 1                                   | —                                            | —                                           |
| Gamma-glutamyltransferase increased    | —                                            | 2 (10.5%) 2                                  | 1 (5.3%) 1                                   | —                                           |
| Bronchitis                             | 3 (10.0%) 3                                  | —                                            | —                                            | —                                           |
| Back pain                              | —                                            | —                                            | 2 (10.5%) 2                                  | —                                           |
| Rash                                   | 2 (6.7%) 2                                   | —                                            | —                                            | —                                           |

N = Number of patients in Safety Set; n = Number of patients having the event; %, proportion of patients having the event; ne = Number of TEAEs.

**Table 3: Summary of Scales for Evaluation of Sedative Effects (safety population N=72)**

| Scale                                                                    | Visit  | Statistic | Absolute value | Absolute change | Relative change (%) |              |
|--------------------------------------------------------------------------|--------|-----------|----------------|-----------------|---------------------|--------------|
| How much alert do you feel?<br>(0=drowsy, 10=alert)                      | V2     | n         | 71             |                 |                     |              |
|                                                                          |        | Mean (SD) | 6.9 (2.31)     |                 |                     |              |
|                                                                          |        | Median    | 7.0            |                 |                     |              |
|                                                                          | V5     | n         | 55             |                 | 54                  | 54           |
|                                                                          |        | Mean (SD) | 6.8 (2.06)     | -0.3 (1.82)     |                     | -0.5 (25.59) |
|                                                                          |        | Median    | 7.0            | 0.0             |                     | 0.0          |
|                                                                          | V6/EDV | n         | 65             |                 | 64                  | 63           |
|                                                                          |        | Mean (SD) | 6.2 (2.40)     | -0.8 (2.68)     |                     | -6.7 (35.18) |
|                                                                          |        | Median    | 6.0            | 0.0             |                     | 0.0          |
| How much clear-headed do you feel?<br>(0=muzzy, 10=clear-headed)         | V2     | n         | 71             |                 |                     |              |
|                                                                          |        | Mean (SD) | 6.6 (2.52)     |                 |                     |              |
|                                                                          |        | Median    | 7.0            |                 |                     |              |
|                                                                          | V5     | n         | 55             |                 | 54                  | 54           |
|                                                                          |        | Mean (SD) | 7.0 (2.06)     | 0.1 (1.98)      |                     | 6.5 (36.90)  |
|                                                                          |        | Median    | 7.0            | 0.0             |                     | 0.0          |
|                                                                          | V6/EDV | n         | 65             |                 | 64                  | 62           |
|                                                                          |        | Mean (SD) | 6.4 (2.26)     | -0.3 (2.04)     |                     | 4.1 (52.24)  |
|                                                                          |        | Median    | 7.0            | 0.0             |                     | 0.0          |
| How much quick-witted do you feel?<br>(0=mentally slow, 10=quick-witted) | V2     | n         | 71             |                 |                     |              |
|                                                                          |        | Mean (SD) | 6.8 (2.30)     |                 |                     |              |
|                                                                          |        | Median    | 7.0            |                 |                     |              |
|                                                                          | V5     | n         | 55             |                 | 54                  | 54           |
|                                                                          |        | Mean (SD) | 6.5 (2.39)     | -0.4 (2.03)     |                     | -1.1 (34.32) |
|                                                                          |        | Median    | 6.0            | 0.0             |                     | 0.0          |
|                                                                          | V6/EDV | n         | 65             |                 | 64                  | 64           |
|                                                                          |        | Mean (SD) | 6.3 (2.33)     | -0.6 (2.42)     |                     | 1.8 (62.46)  |
|                                                                          |        | Median    | 6.0            | 0.0             |                     | 0.0          |
| How much attentive do you feel? (0=dreamy, 10=attentive)                 | V2     | n         | 71             |                 |                     |              |
|                                                                          |        | Mean (SD) | 7.0 (2.33)     |                 |                     |              |
|                                                                          |        | Median    | 7.0            |                 |                     |              |
|                                                                          | V5     | n         | 55             |                 | 54                  | 54           |
|                                                                          |        | Mean (SD) | 6.9 (2.16)     | -0.4 (1.56)     |                     | -3.5 (23.86) |
|                                                                          |        | Median    | 7.0            | 0.0             |                     | 0.0          |
|                                                                          | V6/EDV | n         | 65             |                 | 64                  | 62           |
|                                                                          |        | Mean (SD) | 6.7 (2.35)     | -0.4 (1.97)     |                     | -3.9 (30.15) |
|                                                                          |        | Median    | 7.0            | 0.0             |                     | 0.0          |
|                                                                          |        | Min/Max   | 0.0/10.0       | -6.0/4.0        | -80.0/100.0         |              |

V, visit; EDV, Early Discontinuation Visit; SD: Standard deviation.

**Table 4: Overview of Patient's Global Impression of Change of Intellectual Ability**

| <b>PGIC</b>        | <b>Full Analysis Set<br/>(N=71)<br/>n (%)</b> | <b>Per Protocol Set<br/>(N=55)<br/>n (%)</b> |
|--------------------|-----------------------------------------------|----------------------------------------------|
| Very much improved | 7 (9.9%)                                      | 5 (9.1%)                                     |
| Much improved      | 22 (31.0%)                                    | 20 (36.4%)                                   |
| Minimally improved | 4 (5.6%)                                      | 4 (7.3%)                                     |
| No change          | 19 (26.8%)                                    | 13 (23.6%)                                   |
| Minimally worse    | 8 (11.3%)                                     | 6 (10.9%)                                    |
| Much worse         | 4 (5.6%)                                      | 4 (7.3%)                                     |
| Very much worse    | —                                             | —                                            |
| Missing            | 7 (9.9%)                                      | 3 (5.5%)                                     |

PGIC, Patient Global Impression of Change; N: Number of patients in specified set; n: Number of patients within each category; %: Percentage based on N.
